# Supplementary material for: Carbon-free energetic materials: computational study on nitro-substituted BN-cage molecules with high heat of detonation and stability
Source: Royal Society of Chemistry journal article supplement (doi:10.1039/c7ra13476b), 2018-01-01
Supplement: c7ra13476b1.pdf [file c7ra13476b1.pdf]

# Carbon-Free Energetic Materials: Computational Study on Nitro-substituted BN-cage Molecules with High Heat of Detonation and Stability

Xin Zeng, Nan Li\*, Qingjie Jiao\*

State key Laboratory of Explosion Science and Technology, School of Mechatronical Engineering, Beijing Institute of Technology, Beijing 100081, China

E-mail addresses: [leen04@bit.edu.cn](mailto:leen04@bit.edu.cn), [leen04@163.com](mailto:leen04@163.com) (Nan Li)

[jqj@bit.edu.cn](mailto:jqj@bit.edu.cn), [jqjbit@126.com](mailto:jqjbit@126.com) (Qingjie Jiao)

**Table S1** The calculated densities for some compounds at the M06-2X/6-311++G\*\* level with their experimental data

**Figure S1** The color-filled map and curve map of ELF for B-N bond paths of the designed BN-cage at the M06-2X levels of theory

**Figure S2** Optimized geometries (bond lengths in Å) at the M06-2X level for the mononitro-substituted BN-cage compounds and their isomers. Relative energies (kJ mol<sup>-1</sup>) at M06-2X level are indicated in parentheses

**Table S2** Total energies (E in hartree), relative energies (ΔE in kJ/mol) and symmetries for the mononitro-substituted BN-cage compounds and their isomers at the M06-2X, and B3LYP level.

**Figure S3** The color-filled map and curve map of ELF for B3-N7 bond path of NO<sub>2</sub>-1-3 at the M06-2X levels of theory

**Figure S4** Optimized geometries (bond lengths in Å) at the M06-2X level for the dinitro-substituted BN-cage compounds and their isomers. Relative energies (kJ mol<sup>-1</sup>) at M06-2X level are indicated in parentheses

**Table S3** Total energies (E in hartree), relative energies (ΔE in kJ/mol) and symmetries for the dinitro-substituted BN-cage compounds and their isomers at the M06-2X, ωB97XD and B3LYP level.

**Figure S5** Optimized geometries (bond lengths in Å) at the M06-2X level for the trinitro-substituted BN-cage compounds and their isomers. Relative energies (kJ mol<sup>-1</sup>) at M06-2X level are indicated in parentheses

**Table S4** Total energies (E in hartree), relative energies (ΔE in kJ/mol) and symmetries for the trinitro-substituted BN-cage compounds and their isomers at the M06-2X, ωB97XD and B3LYP level.

**Figure S6** Optimized geometries (bond lengths in Å) at the M06-2X level for the tetranitro-substituted BN-cage compounds and their isomers. Relative energies (kJ mol<sup>-1</sup>) at M06-2X level are indicated in parentheses

**Figure S7** The color-filled map and curve map of ELF for B3-N7 bond path of NO<sub>2</sub>-4-2 at the M06-2X levels of theory

**Figure S8** The color-filled map and curve map of ELF for B3-N7 bond path of NO<sub>2</sub>-4-3 at the M06-2X levels of theory

**Table S5** Total energies (E in hartree), relative energies ( $\Delta E$  in kJ/mol) and symmetries for the tetranitro-substituted BN-cage compounds and their isomers at the M06-2X,  $\omega$ B97XD and B3LYP level.

**Figure S9** Optimized geometries (bond lengths in Å) at the M06-2X level for the pentanitro-substituted BN-cage compounds and their isomers. Relative energies (kJ mol<sup>-1</sup>) at M06-2X level are indicated in parentheses

**Table S6** Total energies (E in hartree), relative energies ( $\Delta E$  in kJ/mol) and symmetries for the pentanitro-substituted BN-cage compounds and their isomers at the M06-2X,  $\omega$ B97XD and B3LYP level.

**Figure S10** The color-filled map and curve map of ELF for B3-N7 bond path of NO<sub>2</sub>-5-1 at the M06-2X levels of theory

**Figure S11** Optimized geometries (bond lengths in Å) at the M06-2X level for the hexanitro-substituted BN-cage compounds and their isomers. Relative energies (kJ mol<sup>-1</sup>) at M06-2X level are indicated in parentheses

**Table S7** Total energies (E in hartree), relative energies ( $\Delta E$  in kJ/mol) and symmetries for the hexanitro-substituted BN-cage compounds and their isomers at the M06-2X,  $\omega$ B97XD and B3LYP level.

**Table S8** Total energies (E), zero point energies (ZPE), thermal correction values ( $H_T$ ), heat of formation (kJ/mol), molecular surface properties( $A_s$ ,  $v\sqrt{tot2}$ ), enthalpy of sublimation ( $\Delta H_{sub}^\circ$ ) and solid phase enthalpy of formation ( $\Delta_f H^\circ(s)$ ) of the NO<sub>2</sub>-substituted BN-cage compounds at the M06-2X/6-311++G\*\* level.

**Table S9** Total energies (E), zero point energies (ZPE), thermal correction values ( $H_T$ ), heat of formation (kJ/mol), molecular surface properties( $A_s$ ,  $v\sqrt{tot2}$ ), enthalpy of sublimation ( $\Delta H_{sub}^\circ$ ) and solid phase enthalpy of formation ( $\Delta_f H^\circ(s)$ ) of the NO<sub>2</sub>-substituted BN-cage compounds at the  $\omega$ B97XD/6-311++G\*\* level.

**Table S10** Total energies (E), zero point energies (ZPE), thermal correction values ( $H_T$ ), heat of formation (kJ/mol), molecular surface properties( $A_s$ ,  $v\sqrt{tot2}$ ), enthalpy of sublimation ( $\Delta H_{sub}^\circ$ ) and solid phase enthalpy of formation ( $\Delta_f H^\circ(s)$ ) of the NO<sub>2</sub>-substituted BN-cage compounds at the B3LYP/6-311++G\*\* level.

**Table S1** The calculated densities for some compounds at the M06-2X/6-311++G\*\* level with their experimental data

| compounds | Experiment(g/cm <sup>3</sup> ) | Calculated(g/cm <sup>3</sup> ) |
|-----------|--------------------------------|--------------------------------|
| TNT       | 1.654                          | 1.647                          |
| RDX       | 1.816                          | 1.800                          |
| HMX       | 1.902                          | 1.877                          |
| PETN      | 1.732                          | 1.656                          |
| CL-20     | 2.040                          | 1.954                          |

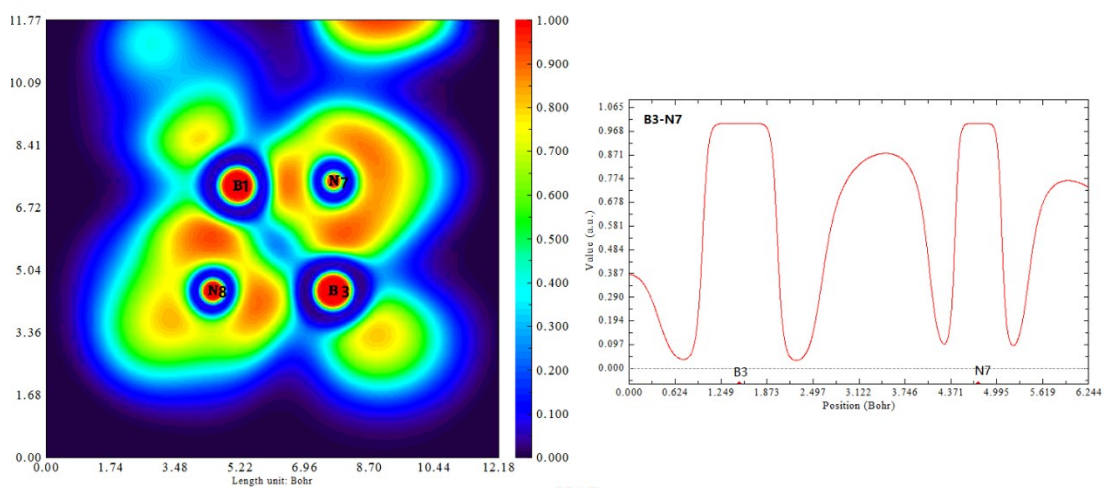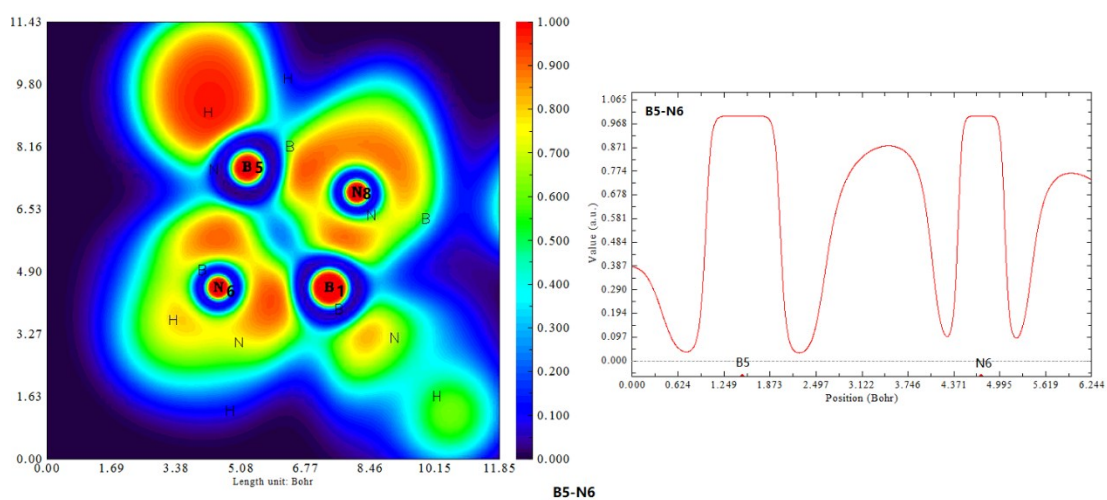

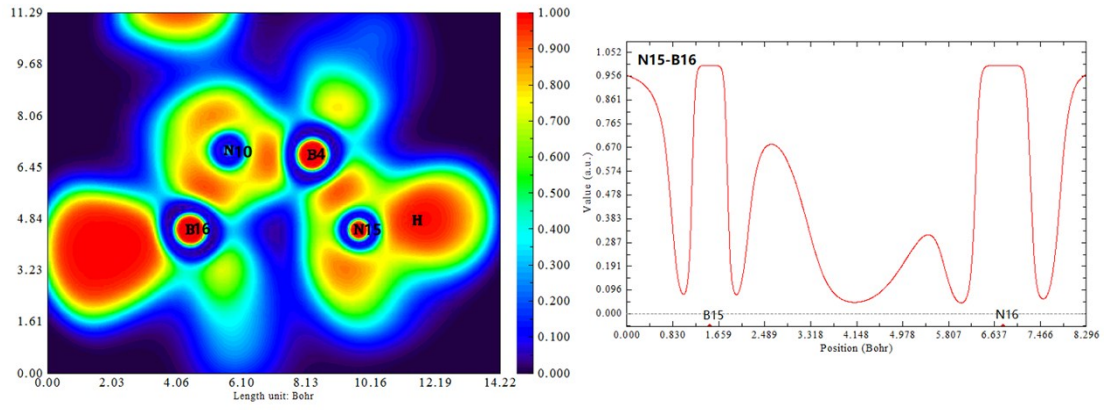

N15-B16

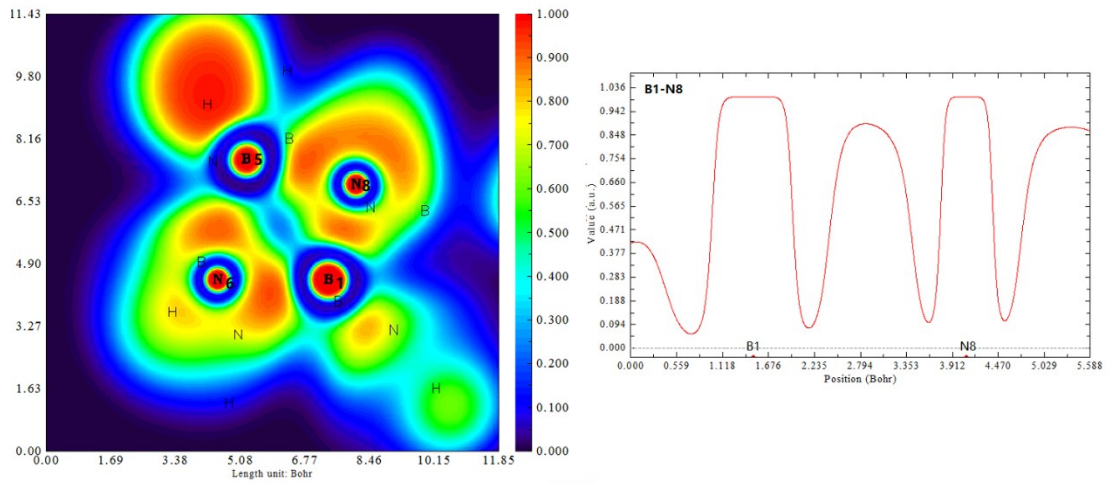

B1-N8

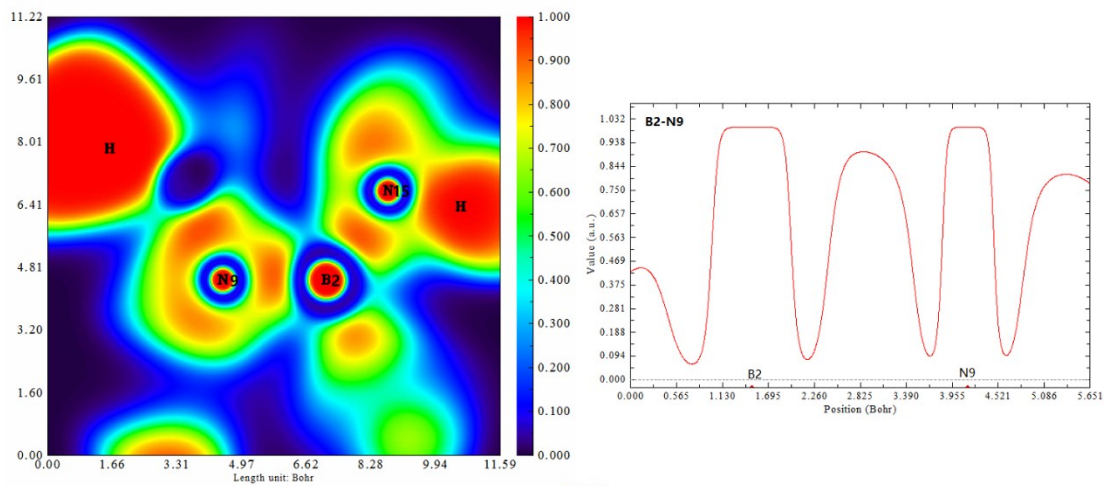

B2-N9

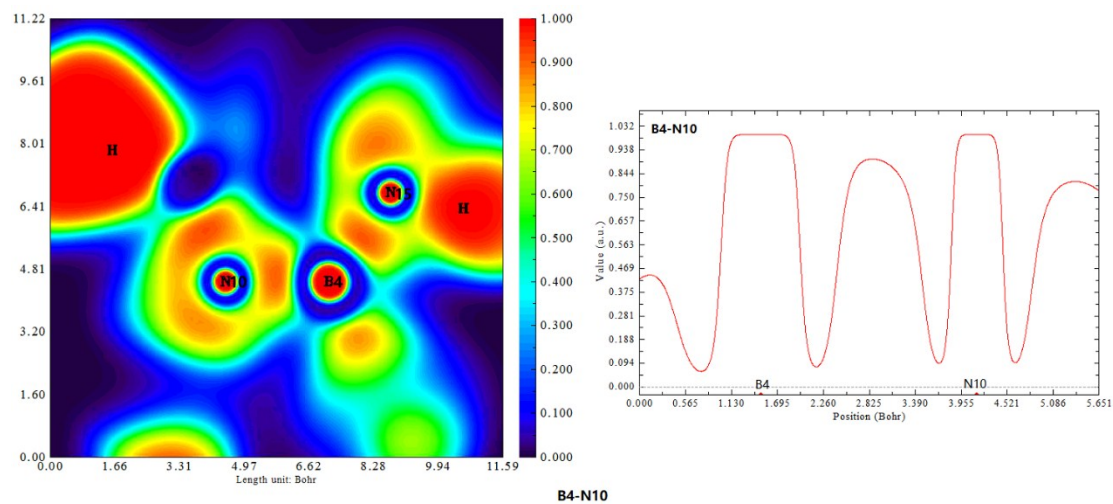

**Figure S1** The color-filled maps and curve maps of ELF for B-N bond paths of the designed BN-cage at the M06-2X levels of theory



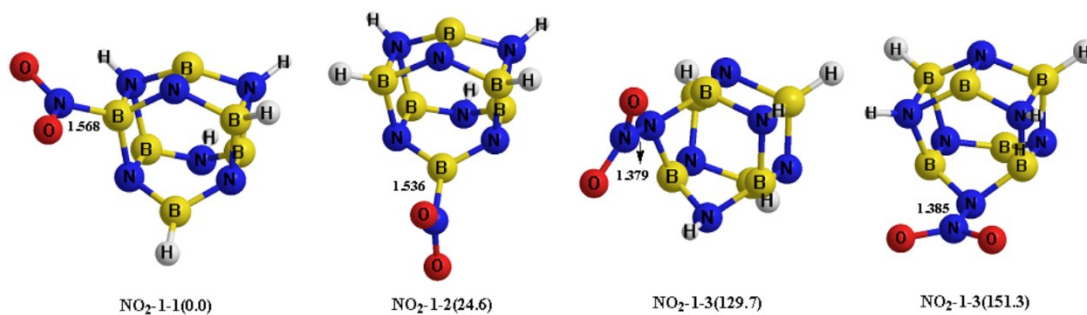

**Figure S2** Optimized geometries (bond lengths in Å) at the M06-2X level for the mononitro-substituted BN-cage compounds and their isomers. Relative energies (kJ mol<sup>-1</sup>) at M06-2X level are indicated in parentheses

**Table S2** Total energies (E in hartree), relative energies ( $\Delta E$  in kJ/mol) and symmetries for the mononitro-substituted BN-cage compounds and their isomers at the M06-2X,  $\omega$ B97XD and B3LYP level.

|                |            | 1-1         | 1-2         | 1-3         | 1-4         |
|----------------|------------|-------------|-------------|-------------|-------------|
| M06-2X         | E          | -685.871906 | -685.862523 | -685.822520 | -685.814304 |
|                | $\Delta E$ | 0           | 24.6        | 129.7       | 151.3       |
|                | symmetry   | C1          | Cs          | C1          | Cs          |
| $\omega$ B97XD | E          | -685.870761 | -685.863046 | -685.823269 | -685.813890 |
|                | $\Delta E$ | 0           | 20.3        | 124.7       | 149.4       |
|                | symmetry   | C1          | Cs          | C1          | Cs          |
| B3LYP          | E          | -685.868852 | -685.862337 | -685.820809 | -685.810796 |
|                | $\Delta E$ | 0.0         | 17.2        | 126.0       | 152.4       |
|                | symmetry   | C1          | Cs          | C1          | Cs          |

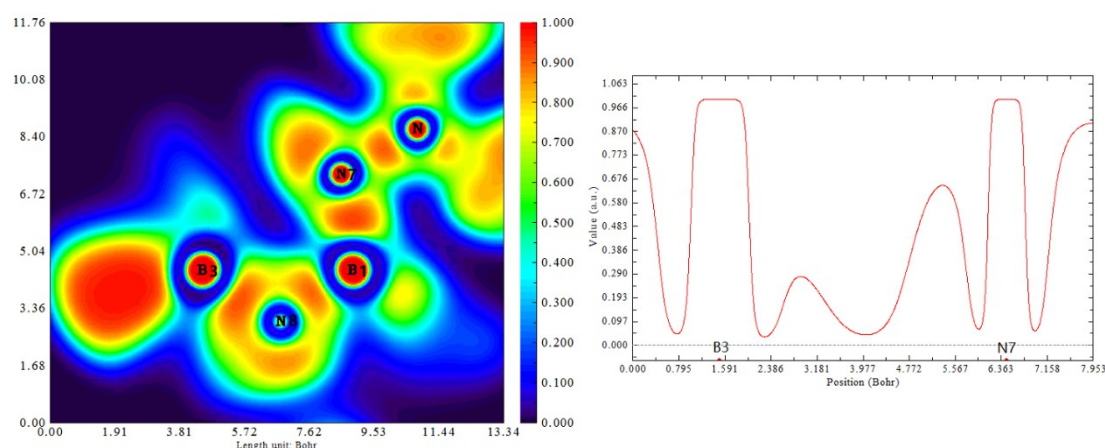

**Figure S3** The color-filled map and curve map of ELF for B3-N7 bond path of NO<sub>2</sub>-1-3 at the M06-2X levels of theory

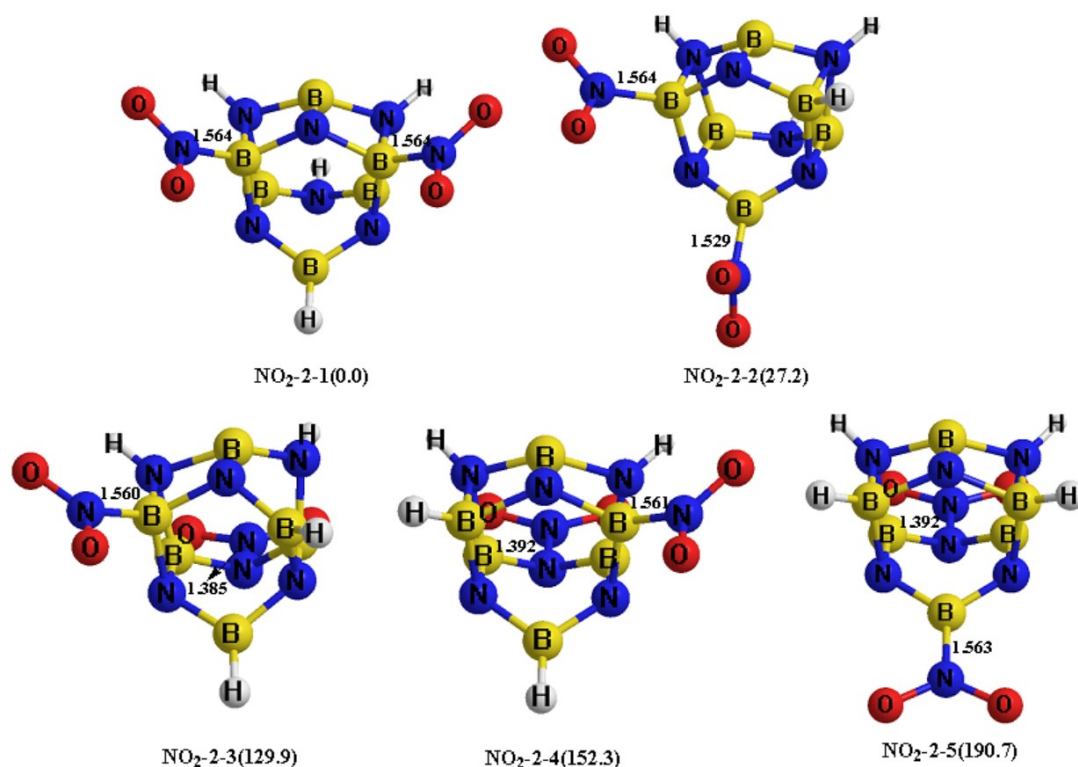

**Figure S4** Optimized geometries (bond lengths in Å) at the M06-2X level for the dinitro-substituted BN-cage compound 6.5ds and their isomers. Relative energies (kJ mol<sup>-1</sup>) at M06-2X level are indicated in parentheses

**Table S3** Total energies (E in hartree), relative energies ( $\Delta E$  in kJ/mol) and symmetries for the dinitro-substituted BN-cage compounds and their isomers at the M06-2X,  $\omega$ B97XD and B3LYP level.

|                |            | 2-1         | 2-2         | 2-3         | 2-4         | 2-5         |
|----------------|------------|-------------|-------------|-------------|-------------|-------------|
| M06-2X         | E          | -890.392507 | -890.382149 | -890.343073 | -890.334532 | -890.319916 |
|                | $\Delta E$ | 0           | 27.2        | 129.9       | 152.3       | 190.7       |
|                | symmetry   | Cs          | C1          | C1          | C1          | Cs          |
| $\omega$ B97XD | E          | -890.397972 | -890.390197 | -890.350567 | -890.340891 | -890.326487 |
|                | $\Delta E$ | 0           | 20.4        | 124.5       | 149.9       | 187.8       |
|                | symmetry   | Cs          | C1          | C1          | C1          | Cs          |
| B3LYP          | E          | -890.389855 | -890.382626 | -890.341921 | -890.331176 | -890.318839 |
|                | $\Delta E$ | 0           | 18.8        | 126.0       | 154.0       | 186.7       |
|                | symmetry   | Cs          | C1          | C1          | C1          | Cs          |

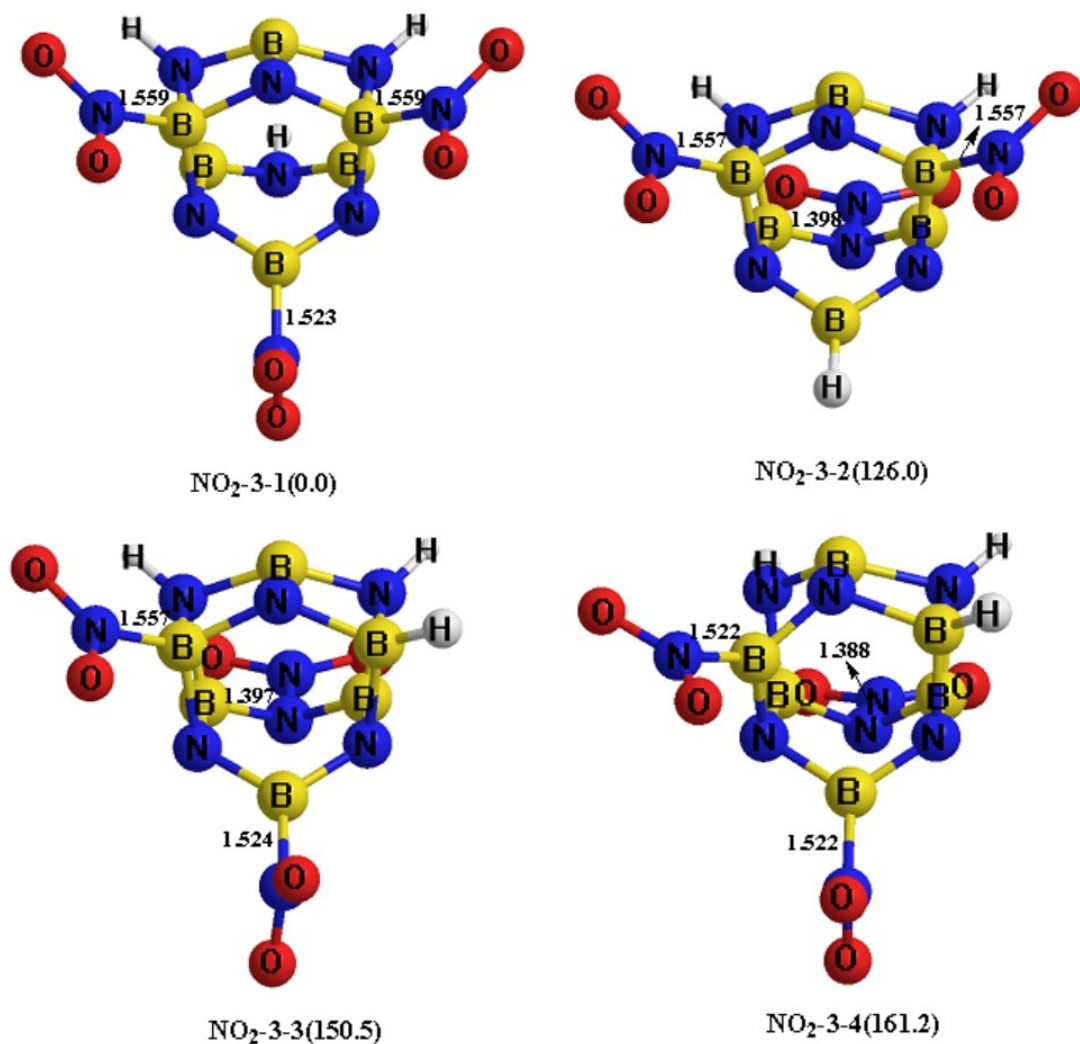

**Figure S5** Optimized geometries (bond lengths in Å) at the M06-2X level for the trinitro-substituted BN-cage compounds and their isomers. Relative energies (kJ mol<sup>-1</sup>) at M06-2X level are indicated in parentheses

**Table S4** Total energies (E in hartree), relative energies ( $\Delta E$  in kJ/mol) and symmetries for the trinitro-substituted BN-cage compounds and their isomers at the M06-2X,  $\omega$ B97XD and B3LYP level.

|                |            | 3-1          | 3-2          | 3-3          | 3-4          |
|----------------|------------|--------------|--------------|--------------|--------------|
| M06-2X         | E          | -1094.897765 | -1094.849808 | -1094.840454 | -1094.836407 |
|                | $\Delta E$ | 0            | 126.0        | 150.5        | 161.2        |
|                | symmetry   | Cs           | Cs           | C1           | C1           |
| $\omega$ B97XD | E          | -1094.913044 | -1094.863675 | -1094.856440 | -1094.856044 |
|                | $\Delta E$ | 0            | 129.7        | 148.7        | 149.7        |
|                | symmetry   | Cs           | Cs           | C1           | C1           |
| B3LYP          | E          | -1094.898515 | -1094.846713 | -1094.840291 | -1094.839262 |
|                | $\Delta E$ | 0            | 136.0        | 152.8        | 155.7        |
|                | symmetry   | Cs           | Cs           | C1           | C1           |



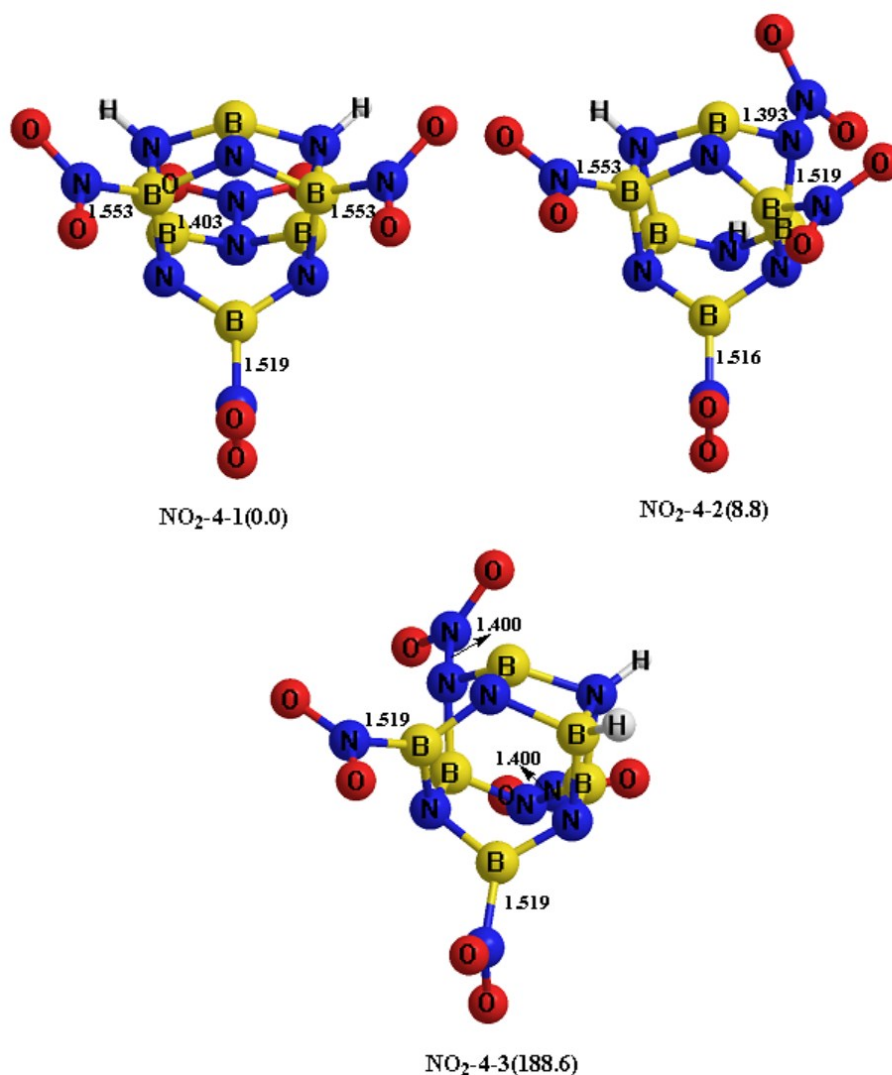

**Figure S6** Optimized geometries (bond lengths in Å) at the M06-2X level for the tetranitro-substituted BN-cage compounds and their isomers. Relative energies (kJ mol<sup>-1</sup>) at M06-2X level are indicated in parentheses

**Table S5** Total energies (E in hartree), relative energies ( $\Delta E$  in kJ/mol) and symmetries for the tetranitro-substituted BN-cage compounds and their isomers at the M06-2X,  $\omega$ B97XD and B3LYP level.

|                |            | 4-1          | 4-2          | 4-3          |
|----------------|------------|--------------|--------------|--------------|
| M06-2X         | E          | -1299.351602 | -1299.348266 | -1299.279785 |
|                | $\Delta E$ | 0            | 8.8          | 188.6        |
|                | symmetry   | Cs           | C1           | Cs           |
| $\omega$ B97XD | E          | -1299.385229 | -1299.386115 | -1299.308946 |
|                | $\Delta E$ | 0            | -2.3         | 200.4        |
|                | symmetry   | Cs           | C1           | Cs           |
| B3LYP          | E          | -1299.351958 | -1299.351286 | -1299.283357 |
|                | $\Delta E$ | 0            | 1.7          | 180.0        |
|                | symmetry   | Cs           | C            | Cs           |

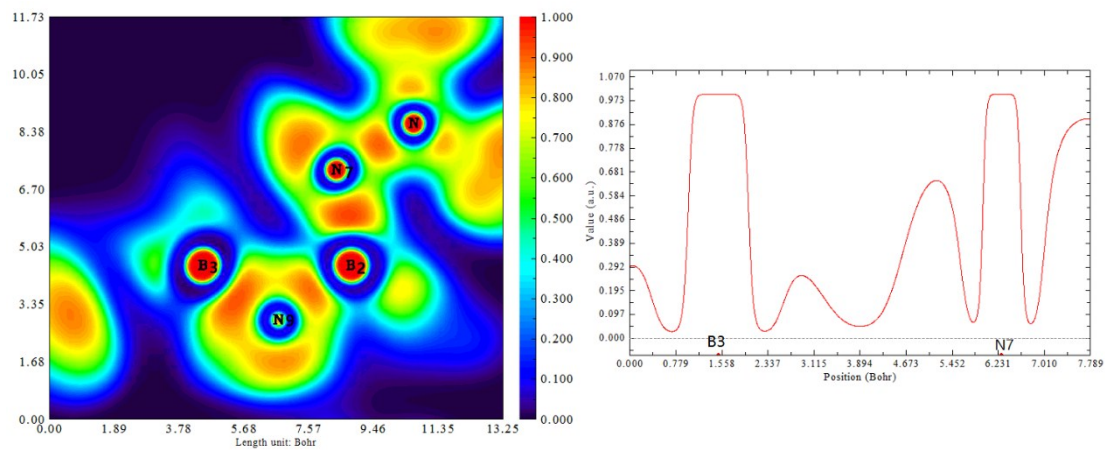

**Figure S7** The color-filled map and curve map of ELF for B3-N7 bond path of NO<sub>2</sub>-4-2 at the M06-2X levels of theory

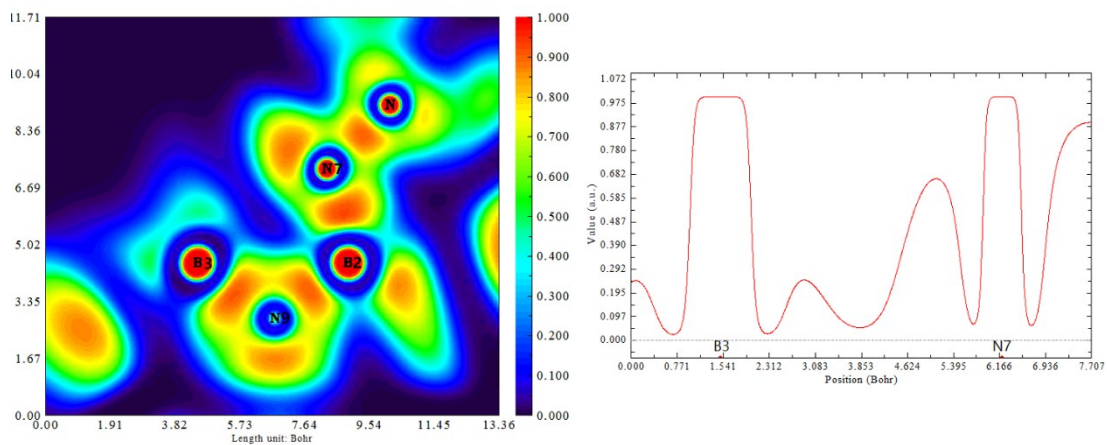

**Figure S8** The color-filled map and curve map of ELF for B3-N7 bond path of NO<sub>2</sub>-4-3 at the M06-2X levels of theory

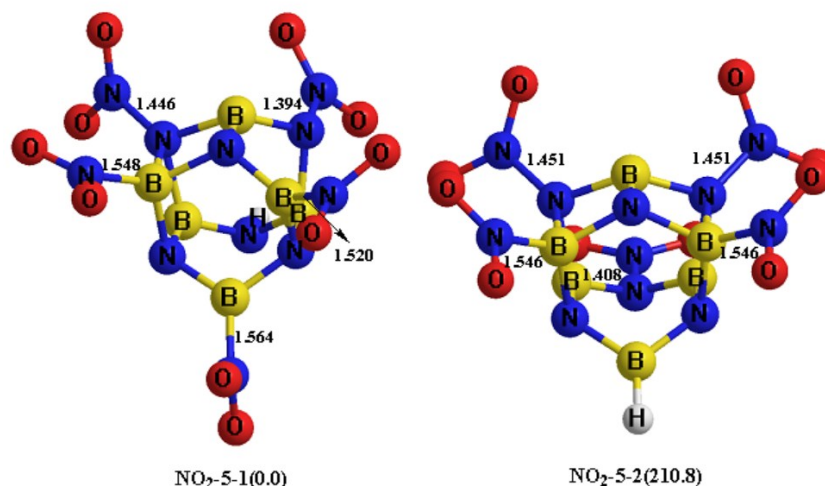

**Figure S9** Optimized geometries (bond lengths in Å) at the M06-2X level for the pentanitro-substituted BN-cage compounds and their isomers. Relative energies (kJ mol<sup>-1</sup>) at M06-2X level are indicated in parentheses

**Table S6** Total energies (E in hartree), relative energies ( $\Delta E$  in kJ/mol) and symmetries for the pentanitro-substituted BN-cage compounds and their isomers at the M06-2X,  $\omega$ B97XD and B3LYP level.

|                |            | 5-1          | 5-2          |
|----------------|------------|--------------|--------------|
| M06-2X         | E          | -1503.799129 | -1503.718869 |
|                | $\Delta E$ | 0            | 210.8        |
|                | symmetry   | C1           | Cs           |
| $\omega$ B97XD | E          | -1503.829668 | -1503.750364 |
|                | $\Delta E$ | 0            | 208.3        |
|                | symmetry   | C1           | Cs           |
| B3LYP          | E          | -1503.781134 | -1503.709551 |
|                | $\Delta E$ | 0            | 188.0        |
|                | symmetry   | C1           | Cs           |

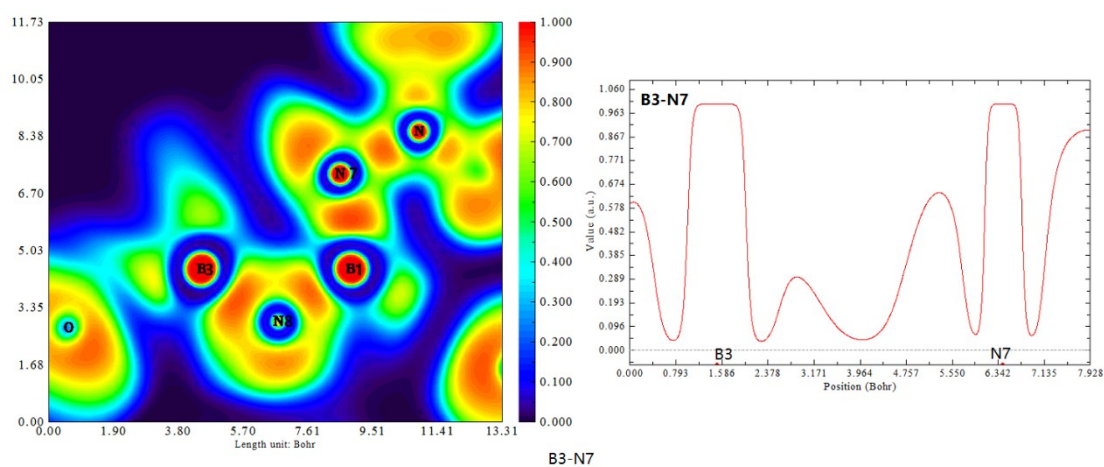

**Figure S10** The color-filled map and curve map of ELF for B3-N7 bond path of NO<sub>2</sub>-5-1 at the M06-2X levels of theory

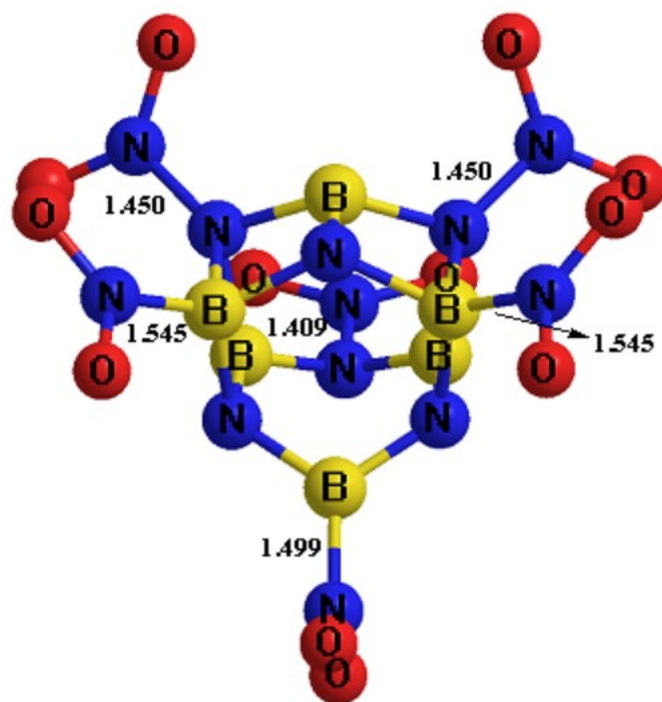

NO<sub>2</sub>-6-1S(0.0)

**Figure S11** Optimized geometries (bond lengths in Å) at the M06-2X level for the hexanitro-substituted BN-cage compounds and their isomers. Relative energies (kJ mol<sup>-1</sup>) at M06-2X level are indicated in parentheses

**Table S7** Total energies (E in hartree), relative energies ( $\Delta E$  in kJ/mol) and symmetries for the hexanitro-substituted BN-cage compounds and their isomers at the M06-2X,  $\omega$ B97XD and B3LYP level.

|                |            | 6-1          |
|----------------|------------|--------------|
| M06-2X         | E          | -1708.236006 |
|                | $\Delta E$ | 0            |
|                | symmetry   | Cs           |
| $\omega$ B97XD | E          | -1708.272682 |
|                | $\Delta E$ | 0            |
|                | symmetry   | Cs           |
| B3LYP          | E          | -1708.209609 |
|                | $\Delta E$ | 0            |
|                | symmetry   | Cs           |

**Table S8** Total energies (E), zero point energies (ZPE), thermal correction values ( $H_T$ ), heat of formation (kJ/mol), molecular surface properties(As,  $v\sigma_{tot2}$ ), enthalpy of sublimation ( $\Delta H_{sub}^\circ$ ) and solid phase enthalpy of formation ( $\Delta_f H^\circ(s)$ ) of the NO<sub>2</sub>-substituted BN-cage compounds at the M06-2X/6-311++G\*\* level.

| compounds | E<br>(Hartree) | ZPE<br>(kJ/mol) | $H_T$<br>(kJ/mol) | As      | $v\sigma_{tot2}$ | $\Delta H_{sub}^\circ$<br>(kJ/mol) | $\Delta_f H^\circ(s)$<br>(kJ/mol) |
|-----------|----------------|-----------------|-------------------|---------|------------------|------------------------------------|-----------------------------------|
| NO2-1-1   | -685.872       | 332.772         | 362.968           | 195.450 | 102.097          | 124.900                            | -289.545                          |
| NO2-2-1   | -890.393       | 343.310         | 380.750           | 222.400 | 88.958           | 132.842                            | -449.511                          |

**Table S9** Total energies (E), zero point energies (ZPE), thermal correction values ( $H_T$ ), heat of formation (kJ/mol), molecular surface properties(As,  $v\sigma_{tot2}$ ), enthalpy of sublimation ( $\Delta H_{sub}^\circ$ ) and solid phase enthalpy of formation ( $\Delta_f H^\circ(s)$ ) of the NO<sub>2</sub>-substituted BN-cage compounds at the  $\omega$ B97XD/6-311++G\*\* level.

| compounds | E<br>(Hartree) | ZPE<br>(kJ/mol) | $H_T$<br>(kJ/mol) | As      | $v\sigma_{tot2}$ | $\Delta H_{sub}^\circ$<br>(kJ/mol) | $\Delta_f H^\circ(s)$<br>(kJ/mol) |
|-----------|----------------|-----------------|-------------------|---------|------------------|------------------------------------|-----------------------------------|
| NO2-1-1   | -685.871       | 331.089         | 361.455           | 195.563 | 99.072           | 123.909                            | -269.297                          |
| NO2-2-1   | -890.398       | 342.447         | 379.931           | 222,788 | 92.823           | 134.435                            | -413.859                          |

**Table S10** Total energies (E), zero point energies (ZPE), thermal correction values ( $H_T$ ), heat of formation (kJ/mol), molecular surface properties(As,  $v\sigma_{tot2}$ ), enthalpy of sublimation ( $\Delta H_{sub}^\circ$ ) and solid phase enthalpy of formation ( $\Delta_f H^\circ(s)$ ) of the NO<sub>2</sub>-substituted BN-cage compounds at the B3LYP/6-311++G\*\* level.

| compounds | E<br>(Hartree) | ZPE<br>(kJ/mol) | $H_T$<br>(kJ/mol) | As      | $v\sigma_{tot2}$ | $\Delta H_{sub}^\circ$<br>(kJ/mol) | $\Delta_f H^\circ(s)$<br>(kJ/mol) |
|-----------|----------------|-----------------|-------------------|---------|------------------|------------------------------------|-----------------------------------|
| NO2-1-1   | -685.869       | 325.331         | 355.989           | 198.391 | 101.246          | 125.908                            | -274.313                          |
| NO2-2-1   | -890.390       | 333.32          | 371.382           | 227.201 | 95.520           | 137.619                            | -554.623                          |
